# Supplementary material for: Crumbs is required to achieve proper organ size control duringDrosophilahead development
Source: Oxford University Press journal article supplement (doi:10.1242/dev.041913), 2010-01-28
Supplement: dev041913tables1.pdf [file dev041913tables1.pdf]

**Table S1. The ratio of major landmarks of the head is the same in *crb* mutant heads compared with WT**

|                                  | Ratio of eye height to antenna length | Ratio of eye height to head width |
|----------------------------------|---------------------------------------|-----------------------------------|
| <i>crb</i> <sup>-/-</sup> female | 1.99                                  | 1.03                              |
| WT female                        | 1.99                                  | 1.01                              |

*n*=10 per genotype.
