# Supplementary material for: Crumbs is required to achieve proper organ size control duringDrosophilahead development
Source: Oxford University Press journal article supplement (doi:10.1242/dev.041913), 2010-01-28
Supplement: dev041913tables2.pdf [file dev041913tables2.pdf]

**Table S2. The *N*, *DI* and *Ser* haplo-insufficiency does not reduce head capsule size**

| Genotypes                                         | Mutant to WT head width ratio | <i>n</i> |
|---------------------------------------------------|-------------------------------|----------|
| <i>N</i> <sup>+/-</sup>                           | 0.99                          | 7        |
| <i>N</i> <sup>+/-</sup> <i>crb</i> <sup>+/-</sup> | 0.99                          | 8        |
| <i>DI</i> <sup>+/-</sup>                          | 0.98                          | 7        |
| <i>Ser</i> <sup>+/-</sup>                         | 0.98                          | 5        |
